# Supplementary material
Source: PubMed Central journal article supplement (PMC2663216)

# Cell Wall Polysaccharide Synthases are Located in Detergent-Resistant Membrane Microdomains in Oomycetes

by

Anne Briolay,<sup>1</sup> Jamel Bouzenzana,<sup>1</sup> Michel Guichardant,<sup>2</sup> Christian Deshayes,<sup>3</sup> Nicolas Sindt,<sup>1</sup>  
Laurence Bessueille,<sup>1</sup> and Vincent Bulone<sup>1,‡,\*</sup>

*UMR CNRS 5246 - Organisation et Dynamique des Membranes Biologiques, Université Lyon I,  
43 Boulevard du 11 Novembre 1918, 69622 Villeurbanne cedex, France,<sup>1</sup> UMR  
870 INSERM/INSA-Univ-Lyon 1/INRA 1235/IMBL, 11 Avenue Jean Capelle, 69621 Villeurbanne  
cedex, France,<sup>2</sup> and UMR CNRS 5246 - Laboratoire de Chimie Organique, 20 Avenue Albert  
Einstein, 69621 Villeurbanne cedex, France<sup>3</sup>*

\* Corresponding author. Mailing address: School of Biotechnology, Royal Institute of Technology (KTH), AlbaNova University Center, SE-10691 Stockholm, Sweden. Phone: (+46) 8 5537 8841. Fax: (+46) 8 5537 8468. E-mail: bulone@kth.se.

‡ Present address: School of Biotechnology, Royal Institute of Technology (KTH), AlbaNova University Center, SE-10691 Stockholm, Sweden.

**Running title: Lipid rafts and glycan synthases in *Saprolegnia***

**Table S1.** Identification of some of the major proteins present in the DRM fraction from *S. monoica* by mass spectrometry and peptide fingerprint after trypsin digestion.

| Spot number <sup>a</sup> | Accession number <sup>b</sup> | Protein identity <sup>c</sup>      | Theoretical MW/pI | Sequence coverage <sup>d</sup> (%) |
|--------------------------|-------------------------------|------------------------------------|-------------------|------------------------------------|
| 1                        | Pr 72463                      | Hsp70                              | 71900/5.15        | <b>24</b>                          |
|                          | Ps 108711                     |                                    | 71386/5.27        | <b>24</b>                          |
| 2                        | Pr 49002                      | V-type ATPase, subunit A           | 62174/5.59        | <b>28</b>                          |
|                          | Ps 108996                     |                                    | 68454/5.49        | <b>27</b>                          |
| 3                        | Pr 49002                      | V-type ATPase, subunit A           | 62174/5.59        | <b>27</b>                          |
|                          | Ps 108996                     |                                    | 68454/5.49        | <b>28</b>                          |
| 4                        | Pr 49002                      | V-type ATPase, subunit A           | 62174/5.59        | <b>31</b>                          |
|                          | Ps 108996                     |                                    | 68454/5.49        | <b>33</b>                          |
| 5                        | Pr 41867                      | V-type ATPase, subunit B           | 54006/5.47        | <b>34</b>                          |
|                          | Ps 108790                     |                                    | 55270/5.35        | <b>36</b>                          |
| 6                        | Pr 41867                      | V-type ATPase, subunit B           | 54006/5.47        | <b>26</b>                          |
|                          | Ps 108790                     |                                    | 55270/5.35        | <b>26</b>                          |
| 7                        | Pr 41867                      | V-type ATPase, subunit B           | 54006/5.47        | <b>28</b>                          |
|                          | Ps 108790                     |                                    | 55270/5.35        | <b>28</b>                          |
| 8                        | Pr 41867                      | V-type ATPase, subunit B           | 54006/5.47        | <b>32</b>                          |
|                          | Ps 108790                     |                                    | 55270/5.35        | <b>33</b>                          |
| 9                        | CAA42559                      | Actin ( <i>Achlya bisexualis</i> ) | 41851/5.30        | <b>38</b>                          |
| 10                       | DQ323662                      | Annexin ( <i>S. monoica</i> )      | 36055/5.41        | <b>39</b>                          |
| 11                       | DQ323662                      | Annexin ( <i>S. monoica</i> )      | 36055/5.41        | <b>42</b>                          |
| 12                       | DQ323662                      | Annexin ( <i>S. monoica</i> )      | 36055/5.41        | <b>38</b>                          |

<sup>a</sup>The spot numbers given in this column correspond to those in Fig. S1.

<sup>b</sup>Pr and Ps, accession numbers in the genome databases of *Phytophthora ramorum* and *Phytophthora sojae* (<http://genome.jgi-psf.org/>); other accession numbers are from the EMBL database and the corresponding detailed information can be retrieved from <http://www.expasy.org>.

<sup>c</sup>Proteins exhibiting significantly high scores using the Mascot algorithm (55; <http://www.matrixscience.com/>).

<sup>d</sup>Fraction of the protein sequence covered by the identified peptides.

FIG. S1. 2D-PAGE analysis of the proteins present in the purified DRMs.

A. Protein profile obtained after silver staining of a 2D gel in which 100  $\mu\text{g}$  protein was loaded (theoretical amount). In this typical example, the isoelectric focusing was performed using a non-linear pH gradient in the range 3-10. The numbers indicate the spots that could be identified by mass spectrometry as detailed in Table S1.

B. As in A, but in the case of a gel containing 250  $\mu\text{g}$  protein.

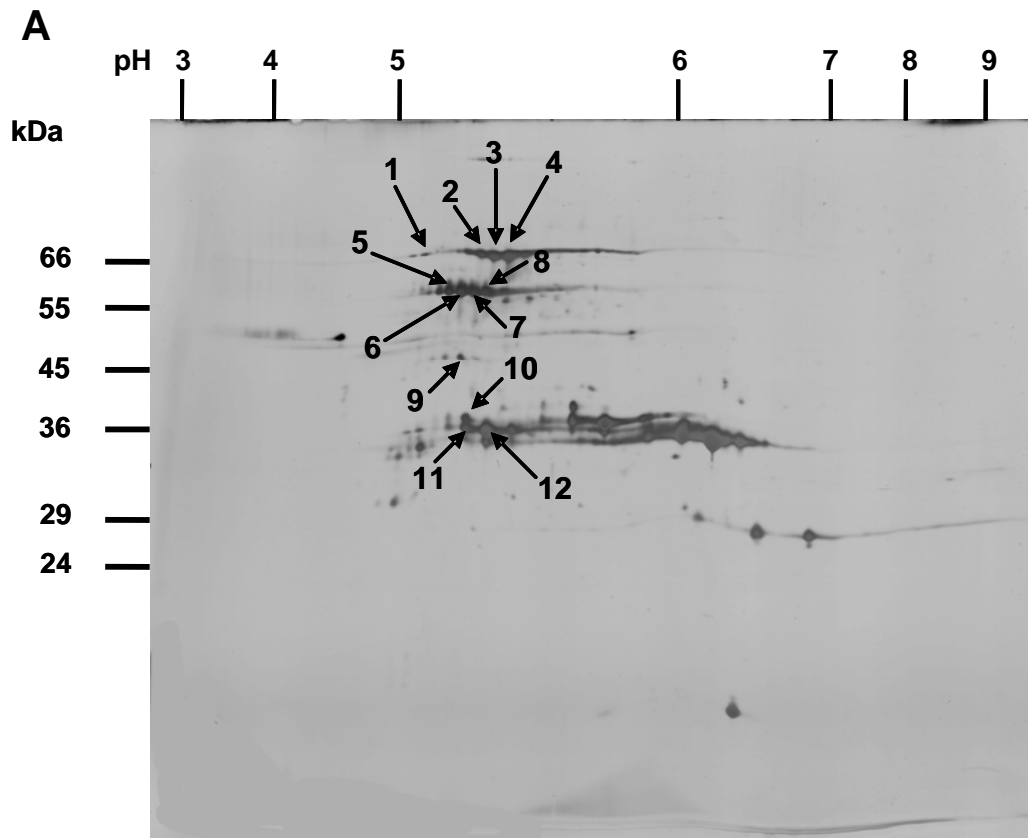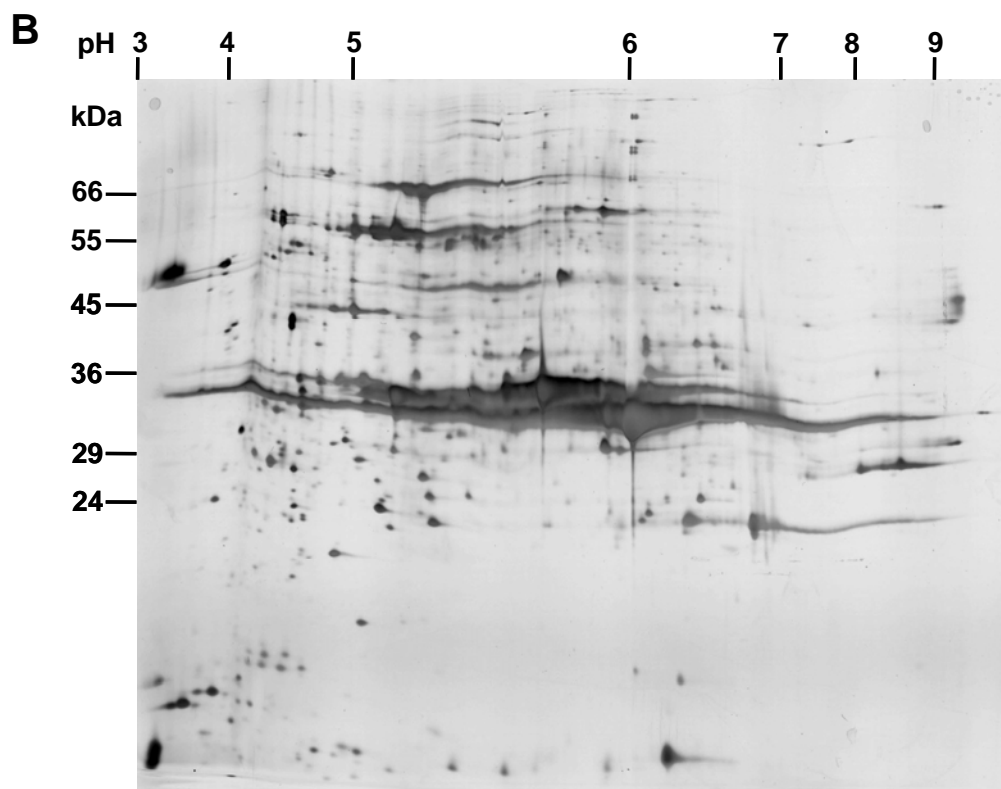

Supplement: supp_75_7_1938__1.pdf [file supp_75_7_1938__1.pdf]
